# Supplementary material
Source: publisher site journal article supplement (https://www.dovepress.com/get_supplementary_file.php?f=429224.docx)

Supplementary Table 1: The missing data of characters.

| **Item** | **Number** | **Item** | **Number** |
| --- | --- | --- | --- |
| Age | 0 | Smoking status | 1 |
| Sex | 0 | Drinking status | 1 |
| Married status | 0 | Sporting | 1 |
| Address Status | 0 | Hypertension | 1 |
| Average earning | 0 | Diabetes | 4 |
| BMI | 32 |  |  |

Supplementary table 2: The prevalence of cardiovascular disease, stroke and heart disease in different provincial administratives.

| **Provincial Administratives** | **Cardiovascular Disease** | | **Stroke** | | **Heart Diseases** | |
| --- | --- | --- | --- | --- | --- | --- |
| N | % | N | % | N | % |
| Anhui | 848 | 7.6 | 648 | 5.6 | 279 | 2.4 |
| Beijing | 613 | 6.6 | 549 | 3.7 | 603 | 4.0 |
| Chongqing | 411 | 5.6 | 376 | 4.4 | 151 | 1.8 |
| Fujian | 124 | 3.5 | 54 | 1.3 | 103 | 2.4 |
| Gansu | 423 | 7.2 | 522 | 4.7 | 343 | 3.1 |
| Guangdong | 1043 | 3.2 | 144 | 1.3 | 208 | 1.9 |
| Guangxi | 863 | 7.0 | 207 | 4.1 | 176 | 3.5 |
| Guizhou | 1345 | 4.0 | 54 | 2.6 | 36 | 1.7 |
| Hainan | 628 | 3.3 | 53 | 1.4 | 81 | 2.1 |
| Hebei | 1752 | 8.3 | 1168 | 6.1 | 611 | 3.2 |
| Heilongjiang | 1041 | 12.1 | 794 | 7.6 | 653 | 6.2 |
| Henan | 2211 | 9.6 | 1502 | 5.9 | 1222 | 4.8 |
| Hubei | 580 | 7.1 | 686 | 4.9 | 415 | 3.0 |
| Hunan | 1903 | 7.3 | 911 | 3.5 | 1215 | 4.6 |
| Inner Mongolia | 1334 | 9.9 | 593 | 6.7 | 467 | 5.3 |
| Jiangsu | 1008 | 7.5 | 1277 | 5.2 | 754 | 3.1 |
| Jiangxi | 324 | 4.5 | 154 | 2.2 | 191 | 2.7 |
| Jilin | 1416 | 12.0 | 1076 | 7.6 | 997 | 7.0 |
| Liaoning | 3418 | 11.1 | 965 | 6.8 | 843 | 5.9 |
| Ningxia | 438 | 8.5 | 232 | 4.9 | 242 | 5.1 |
| Qinghai | 971 | 9.6 | 49 | 1.4 | 303 | 8.8 |
| Shaanxi | 1427 | 10.2 | 805 | 6.7 | 532 | 4.4 |
| Shandong | 2398 | 9.9 | 2658 | 5.6 | 2661 | 5.6 |
| Shanghai | 483 | 11.7 | 150 | 3.7 | 371 | 9.1 |
| Shanxi | 817 | 9.1 | 1108 | 6.7 | 547 | 3.3 |
| Sichuan | 1061 | 5.6 | 946 | 3.5 | 663 | 2.4 |
| Tianjin | 791 | 13.6 | 438 | 6.9 | 586 | 9.2 |
| Xinjiang | 366 | 4.5 | 189 | 1.8 | 345 | 3.2 |
| Yunnan | 267 | 2.9 | 114 | 2.0 | 62 | 1.1 |
| Zhejiang | 467 | 4.5 | 433 | 2.2 | 538 | 2.7 |

Supplementary figure 1: The details of participants distribution in different provincial administratives.


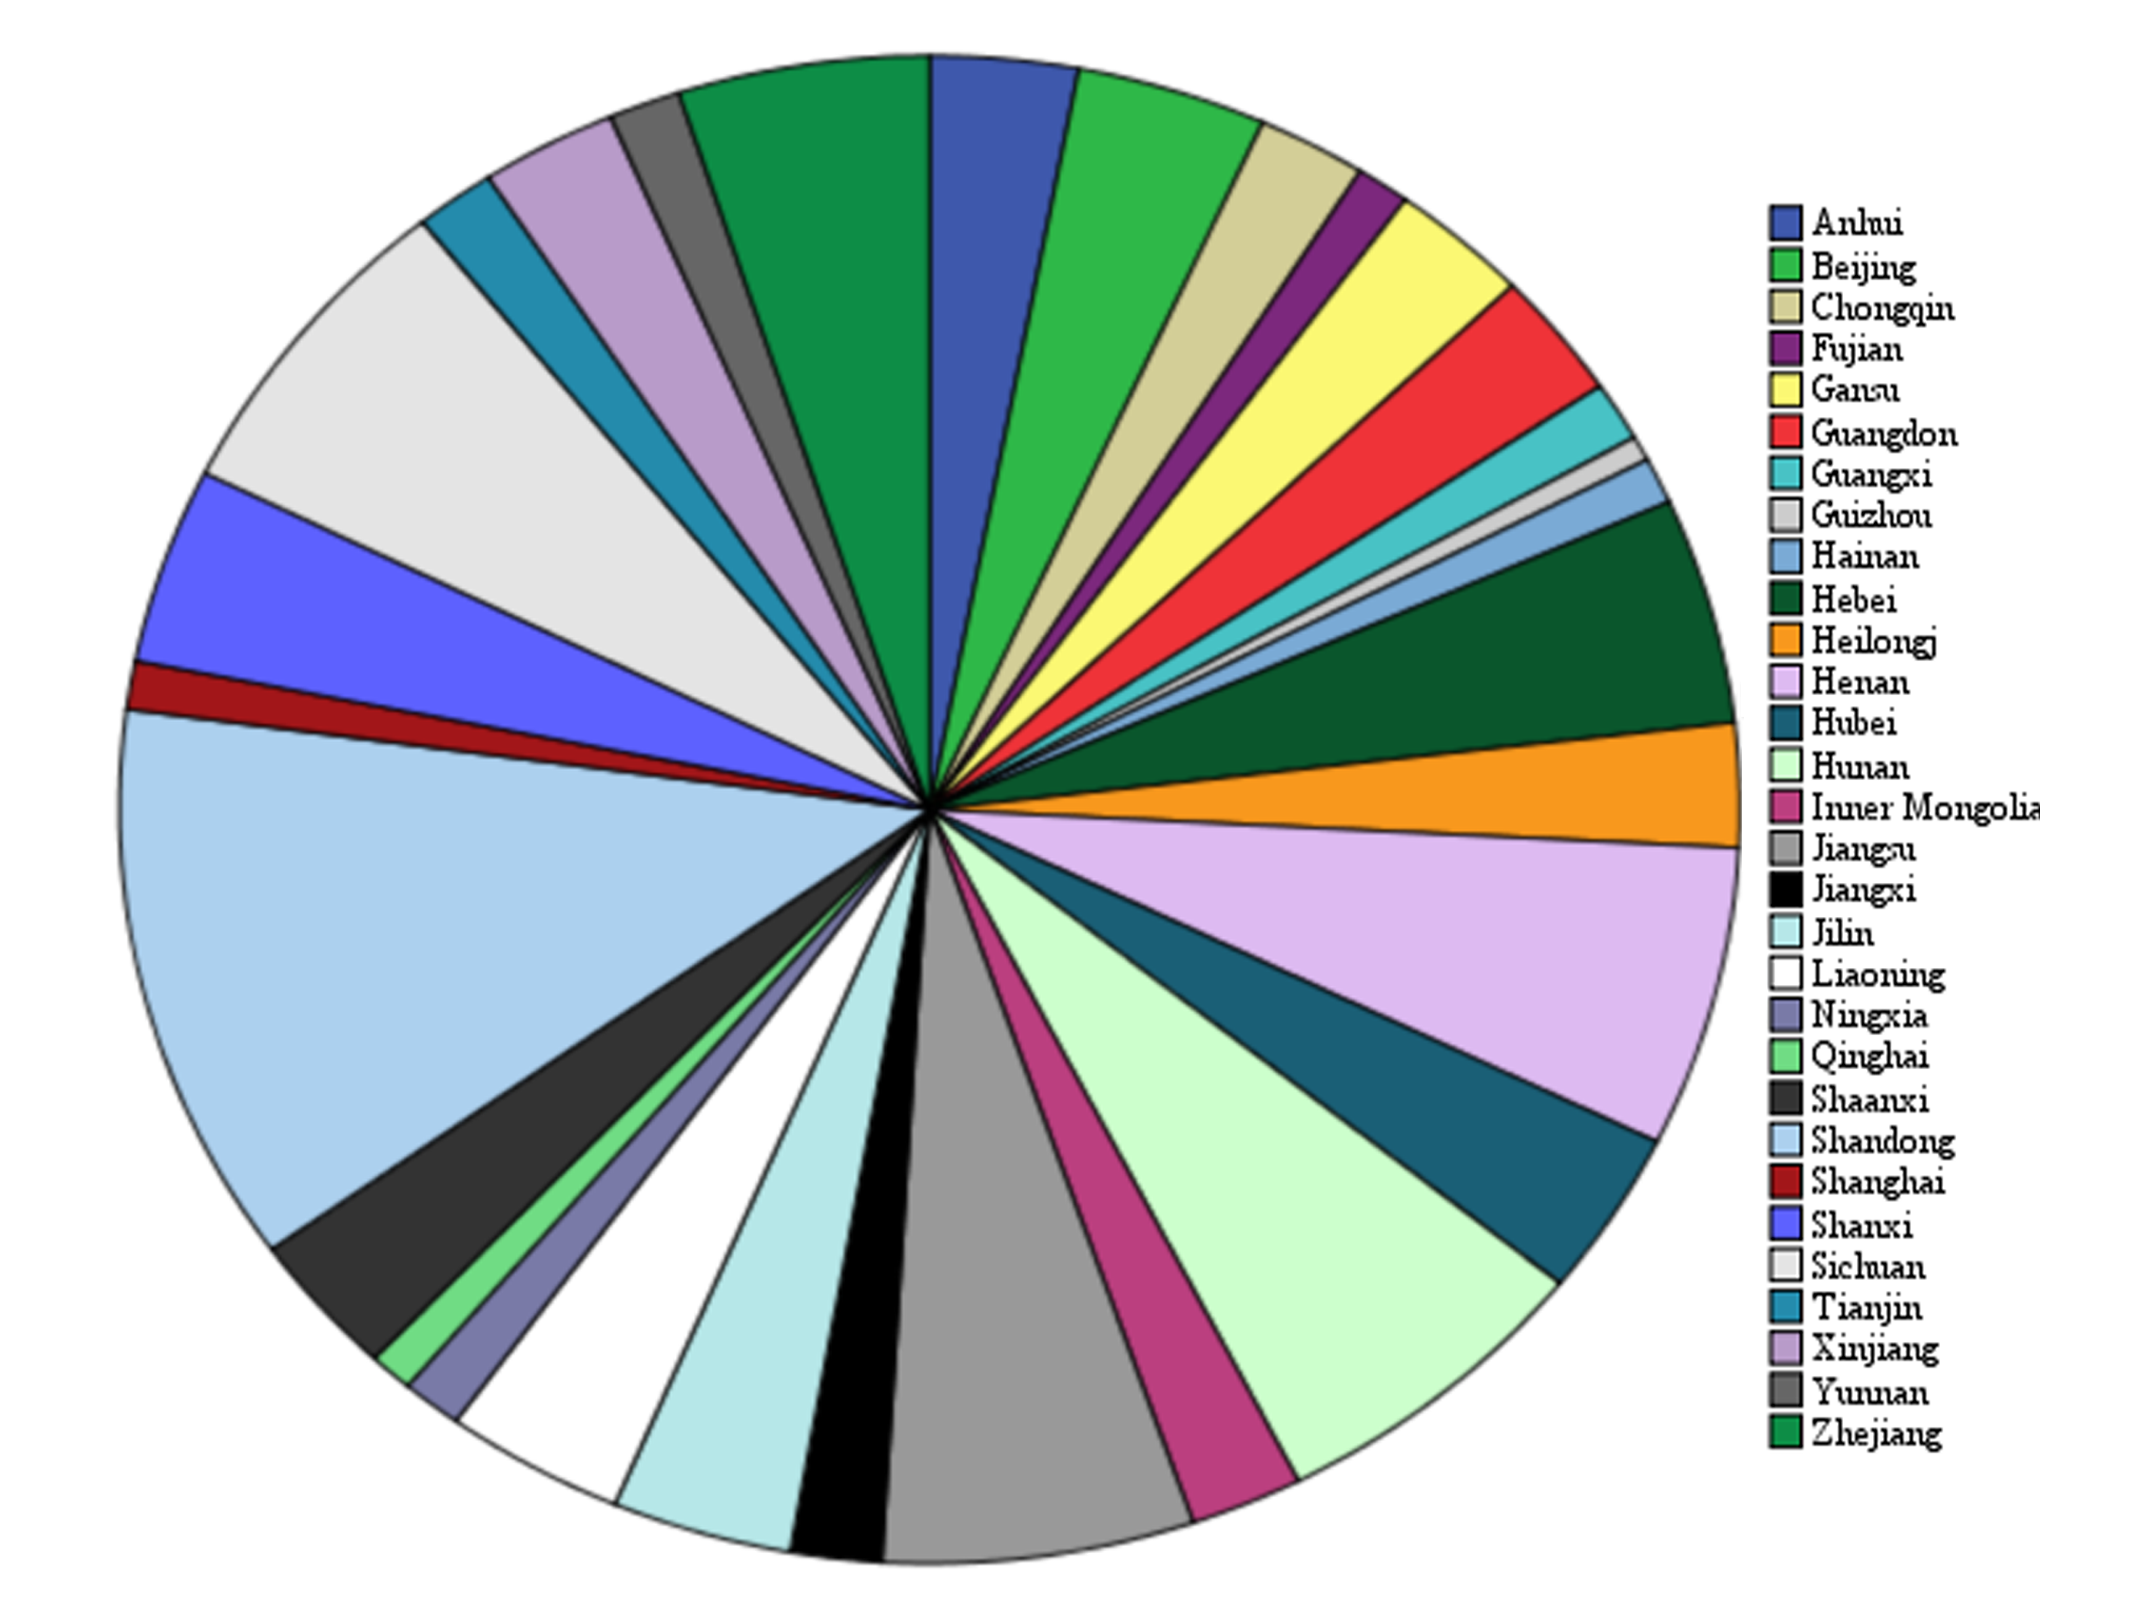

Supplement: Supplementary file 1 [file get_supplementary_file.php]
